# Supplementary material for: Investigating the Assemblages of Two Groups of Collembola (Strong Furca and Weak Furca) under Different Agricultural Management Systems, Northeastern China
Source: MDPI journal article supplement (doi:10.3390/d14110994), 2022-11-17
Supplement: s1 [file s1]

**Supplementary data A:** Collembola species information that was identified during the research.

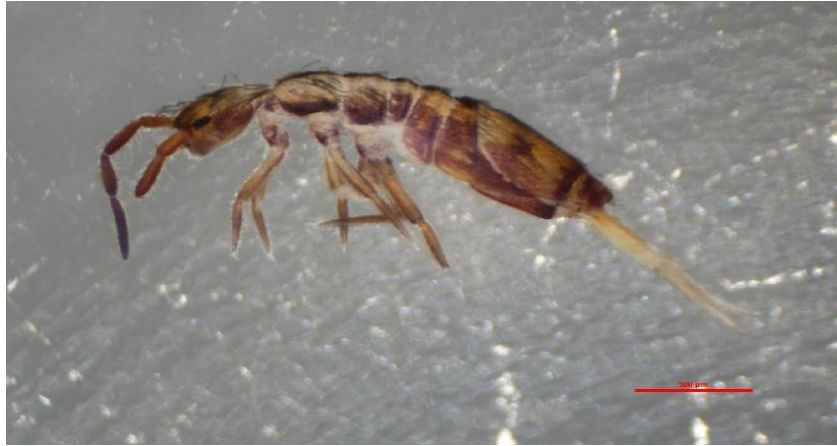

Species 1: *Entomobrya sibirica* Stach, 1963

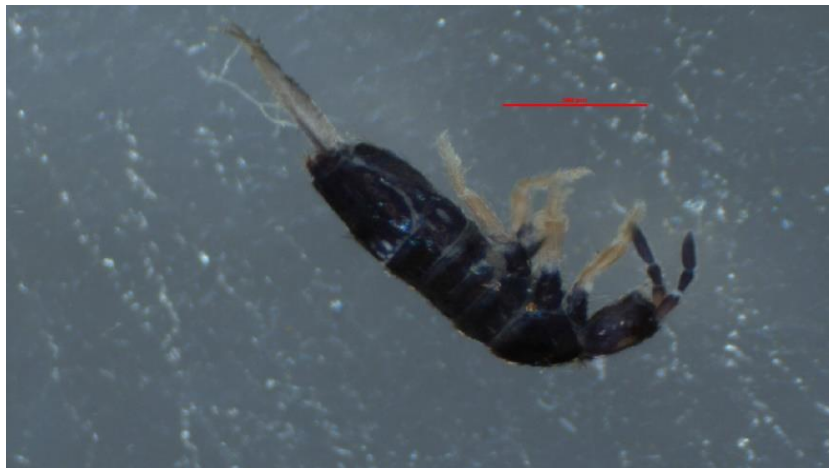

Species 2: *Lepidocyrtus cf. arrabonicus* Larr\_Niea\_3

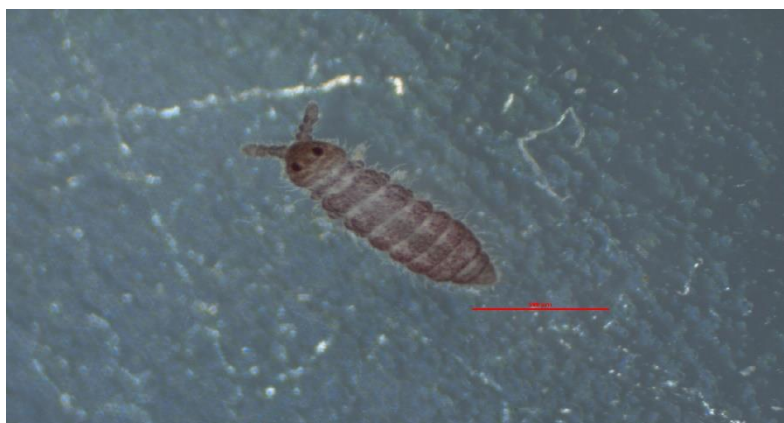

Species 3: *Hypogastrura* sp1

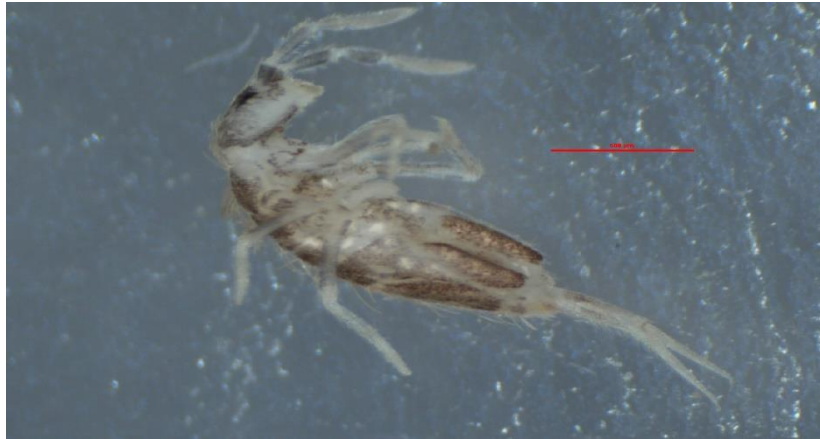

Species 4: *Homidia socia* Denis, 1929

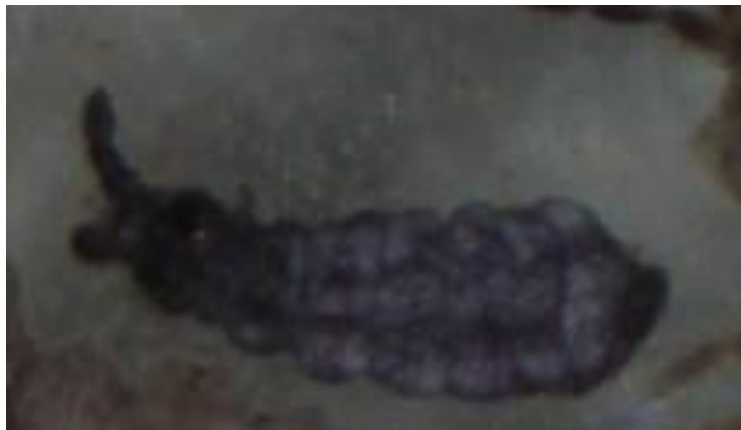

Species 5: *Friesea* sp1.

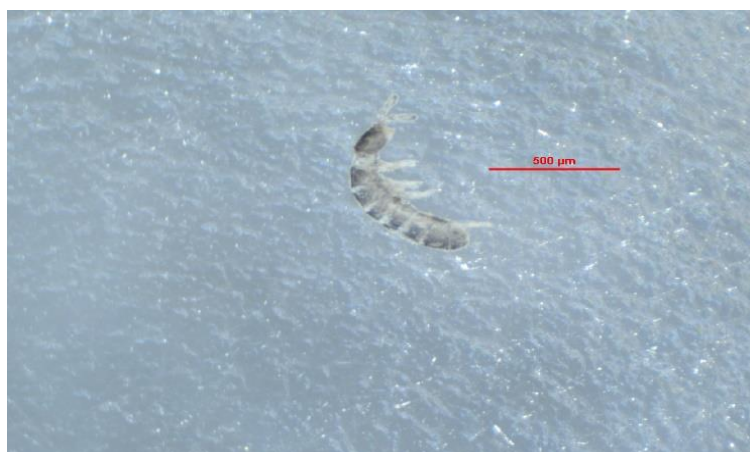

Species 6: *Isotogastrura* sp1.

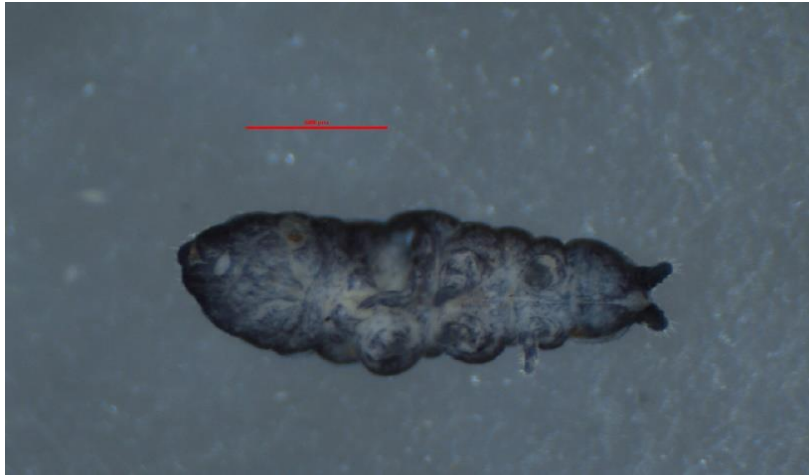

Species 7: *Onychiurus* sp1.

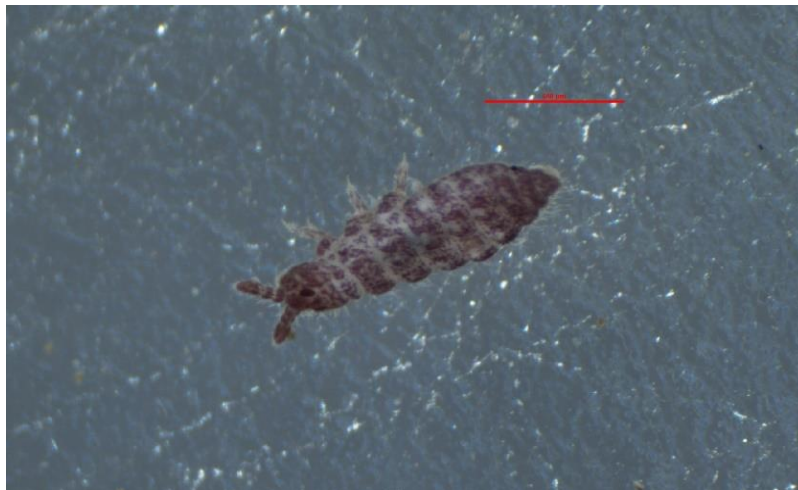

Species 8: *Hypogastrura* sp2.

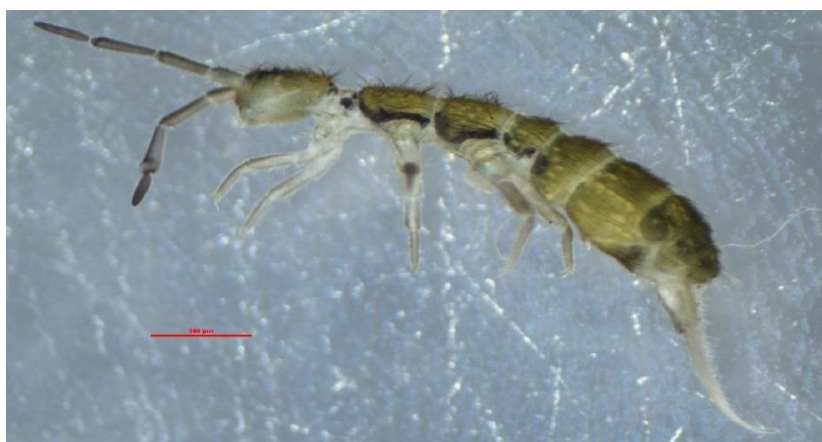

Species 9: *Isotogastrura* sp2.



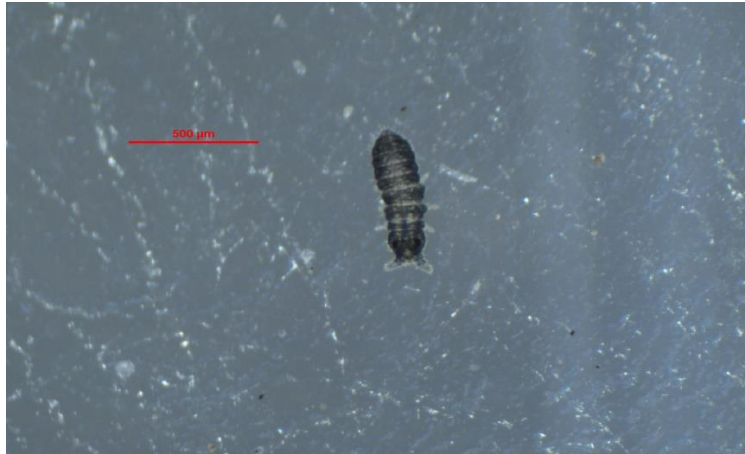

Species 10: *Hypogastrura* sp3.

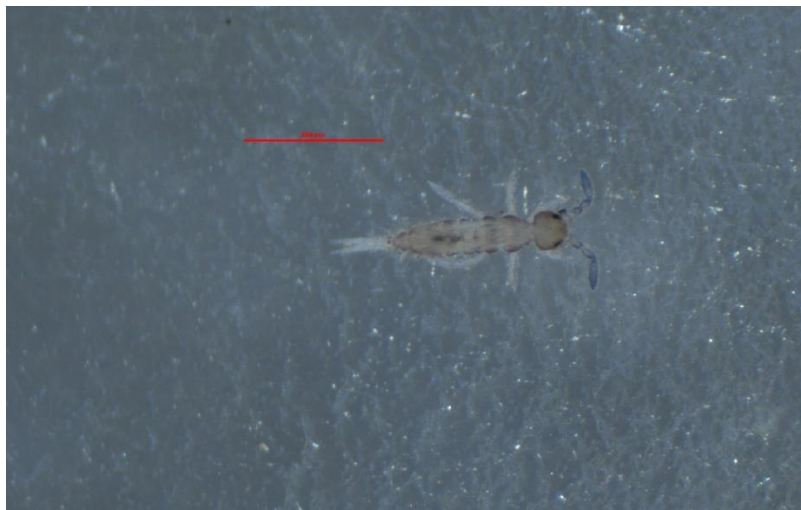

Species 11: *Entomobrya* sp1.

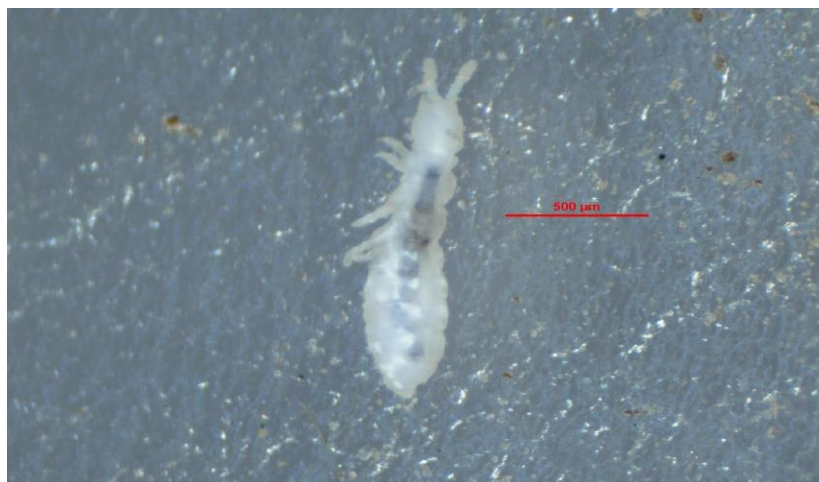

Species 12: *Thalassaphorura encarpata* Denis, 1931

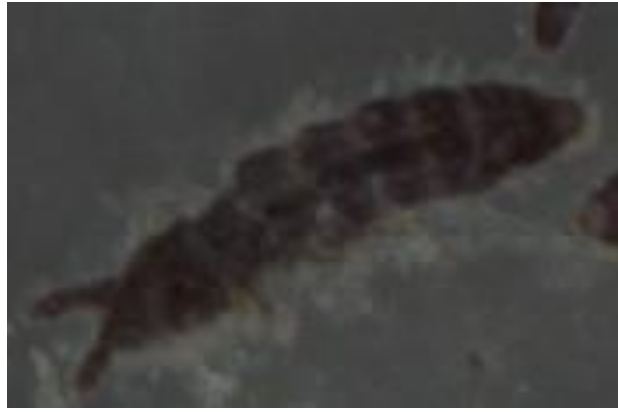

Species 13: *Friesea* sp2.

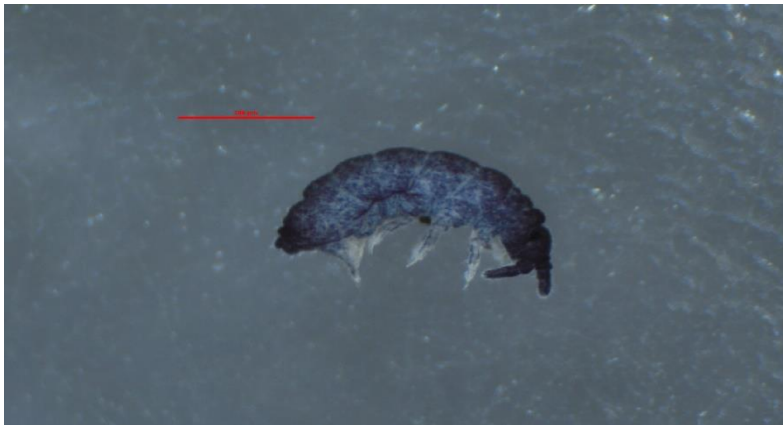

Species 14: *Entomobrya unostriata* Stach, 19

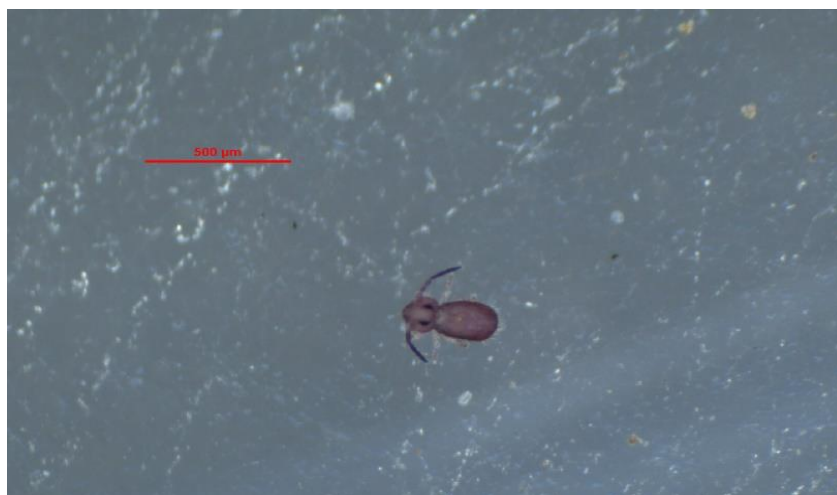

Species 15: *Folsomia quadrioculata* Tullberg, 1871

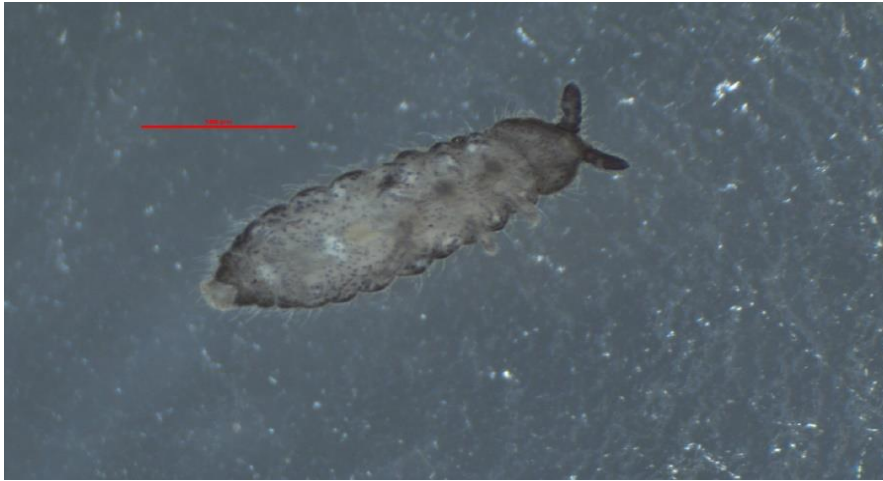

Species 16: *Schoettella unguiculata* Mitra, 1977

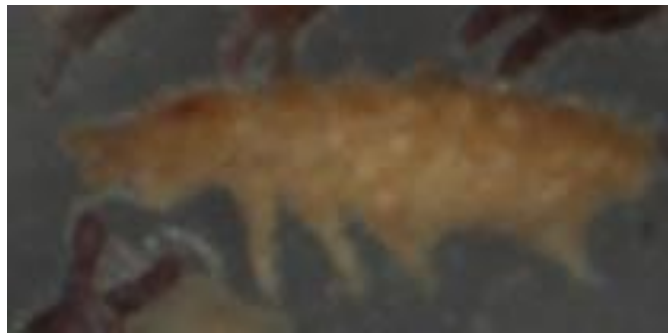

Species 17: *Ceratophysella* sp1.

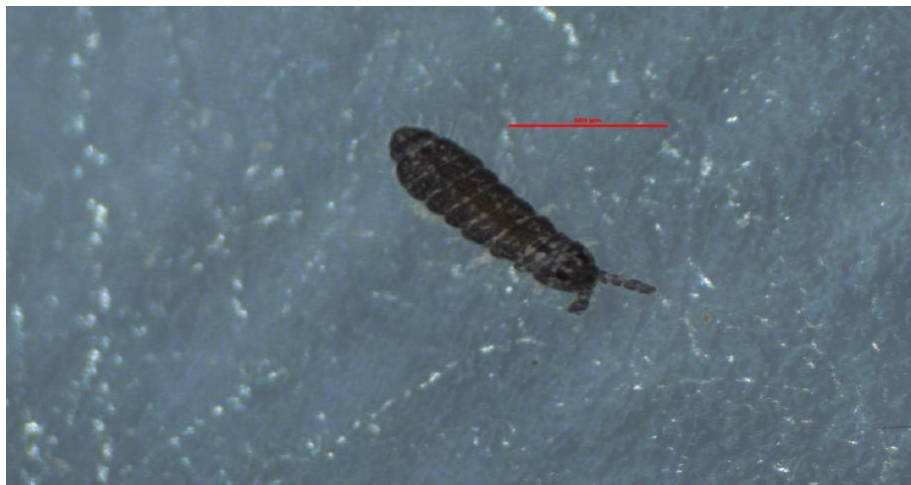

Species 18: *Friesea* sp3.

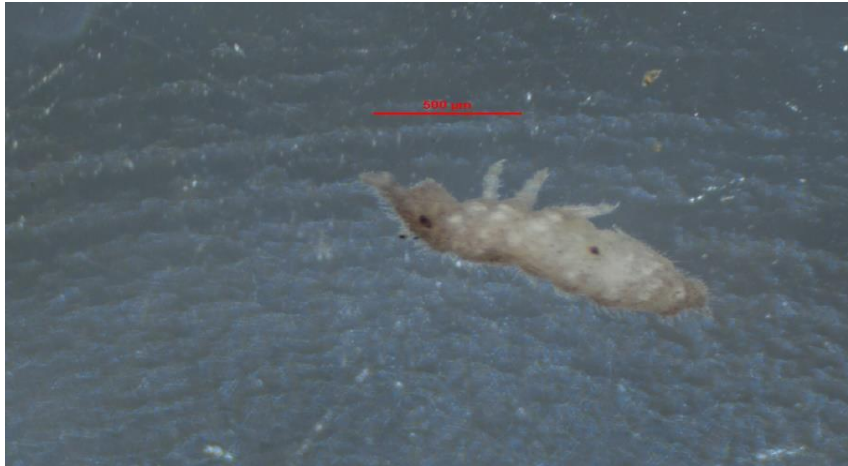

Species 19: *Hypogastrura* sp4.

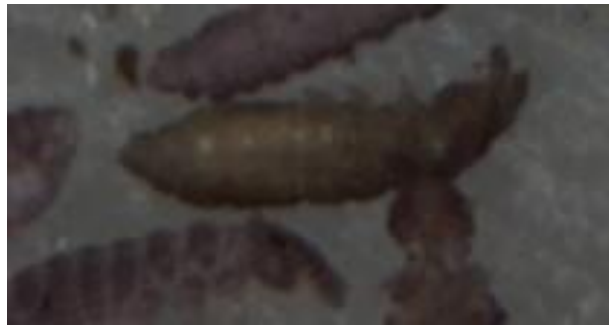

Species 20: *Friesea* sp4.

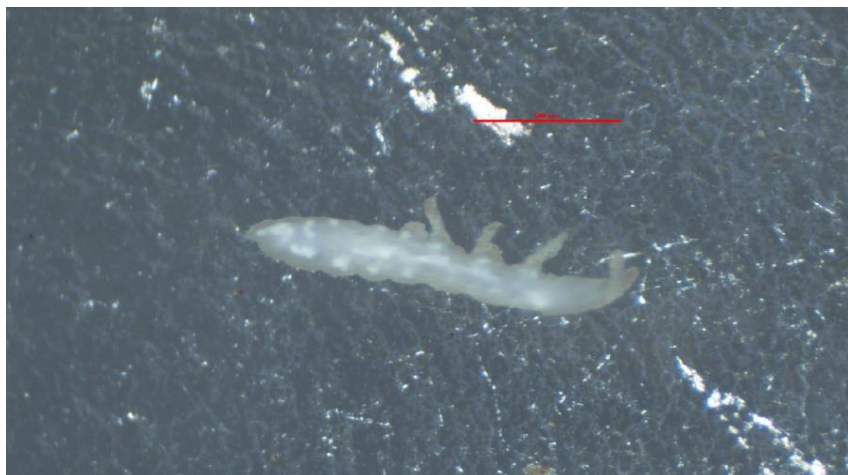

Species 21: *Onychiurus flavescens* Kinoshita, 1916



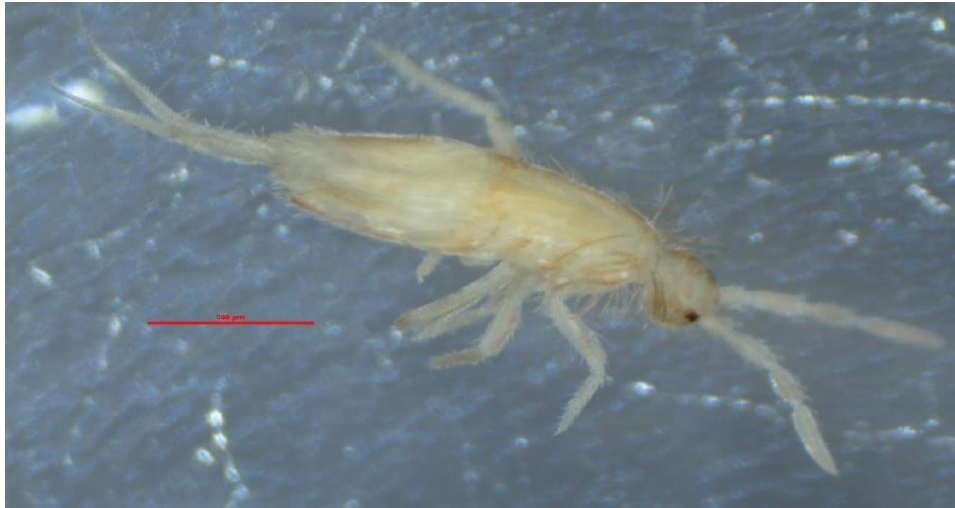

Species 22: *Homidia* sp1.

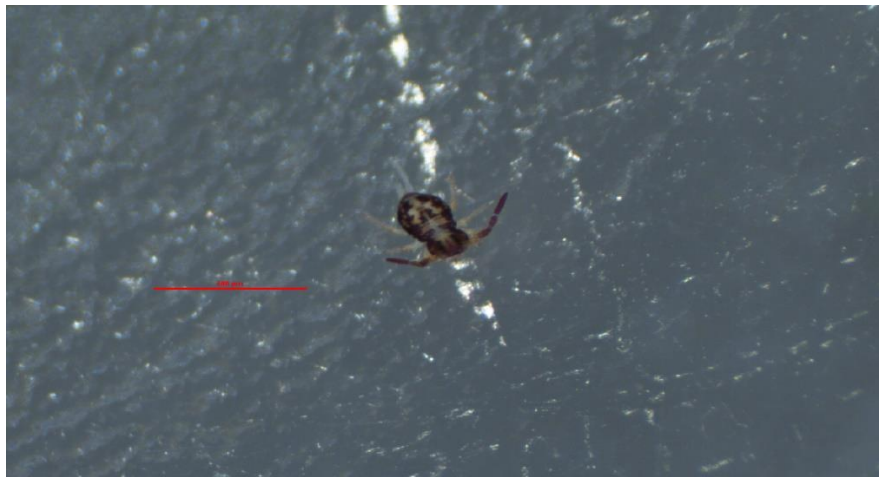

Species 23: *Bourletiella* sp1.

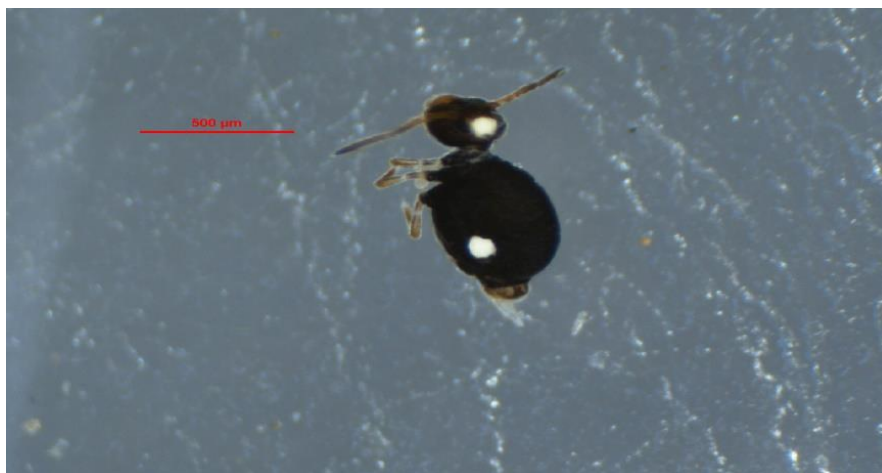

Species 24: *Sminthurinus bimaculatus* Axelson, 1902



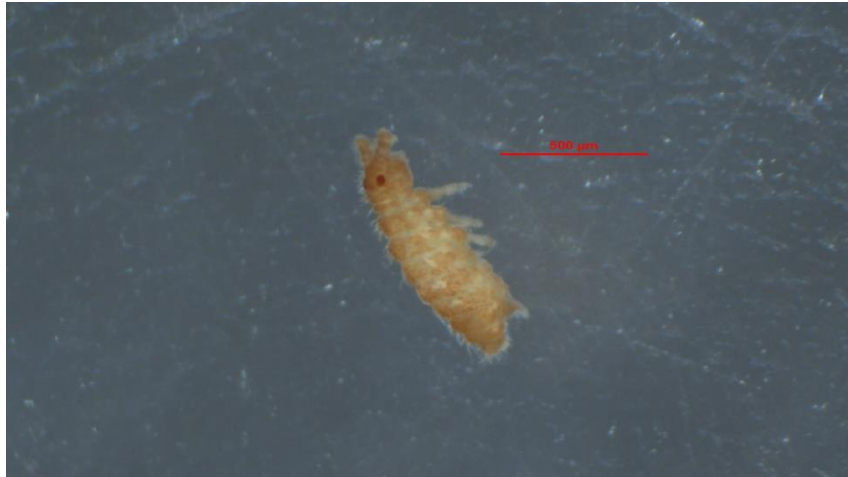

Species 25: *Hypogastrura* sp5.

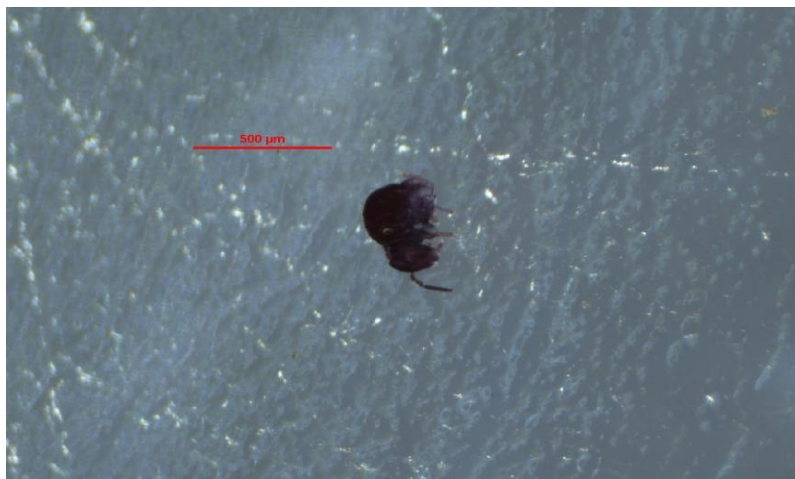

Species 26: *Sminthurides* sp1.

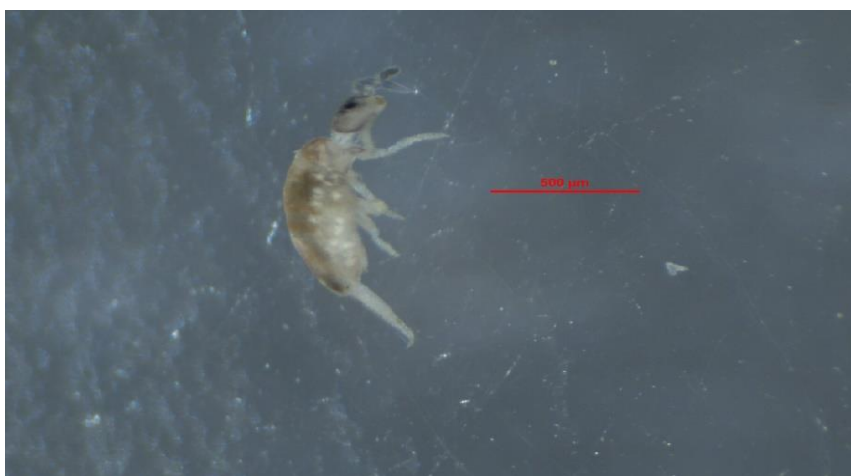

Species 27: *Pseudosinella octopunctata* Börner, 1901

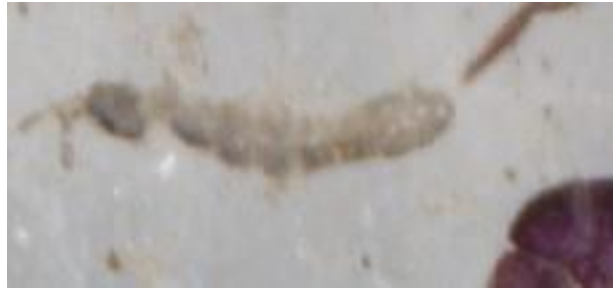

Species 28: *Bourletiella* sp2.

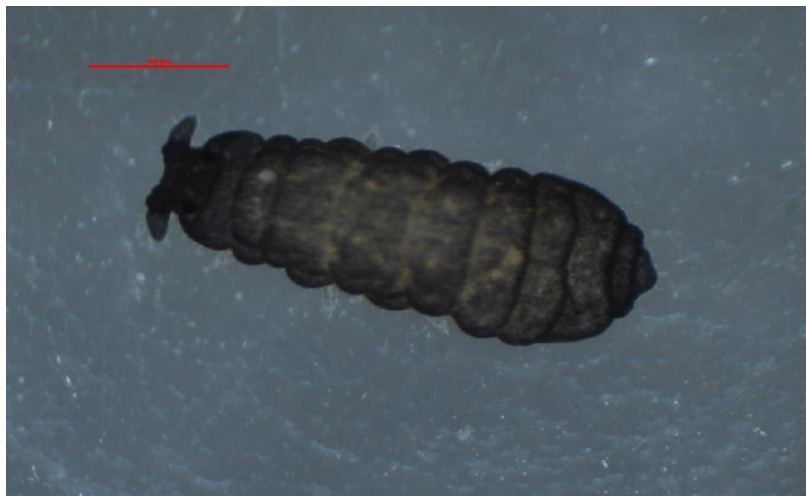

Species 29: *Neanura* sp1.

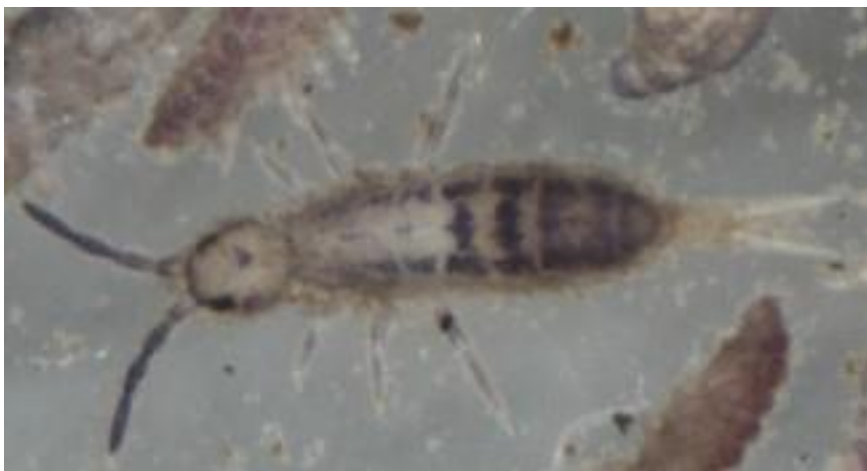

Species 30: *Isotogastrura* sp1.

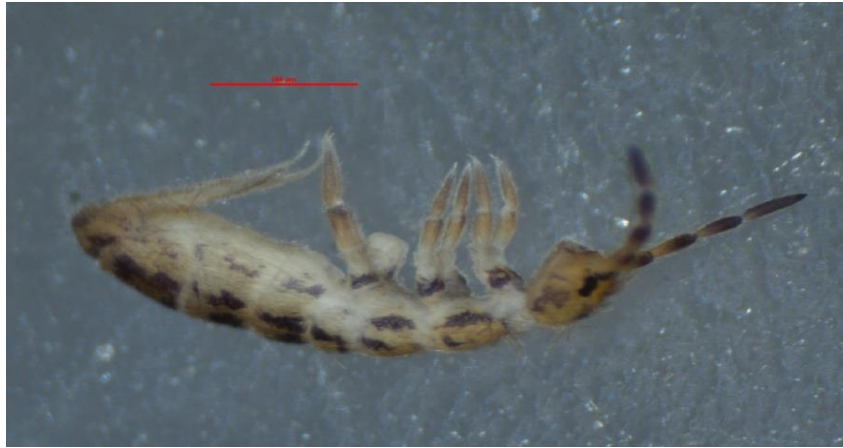

Species 31: *Orchesellides sinensis* Denis, 1929

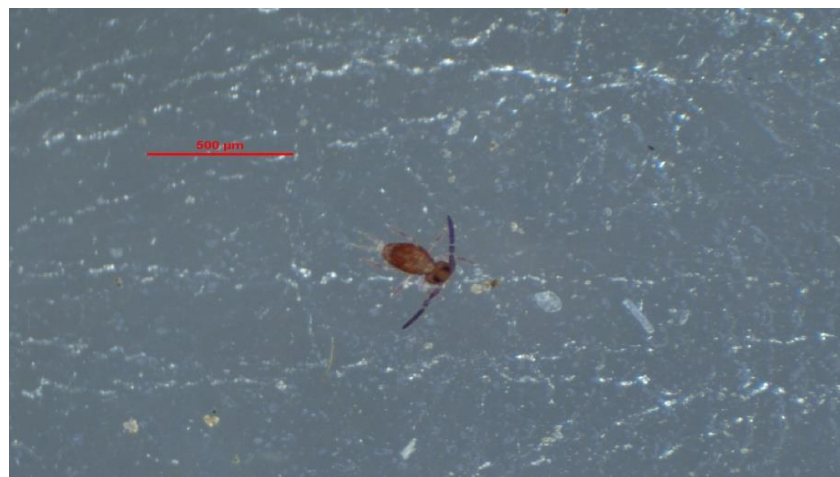

Species 32: *Sminthurides* sp2.

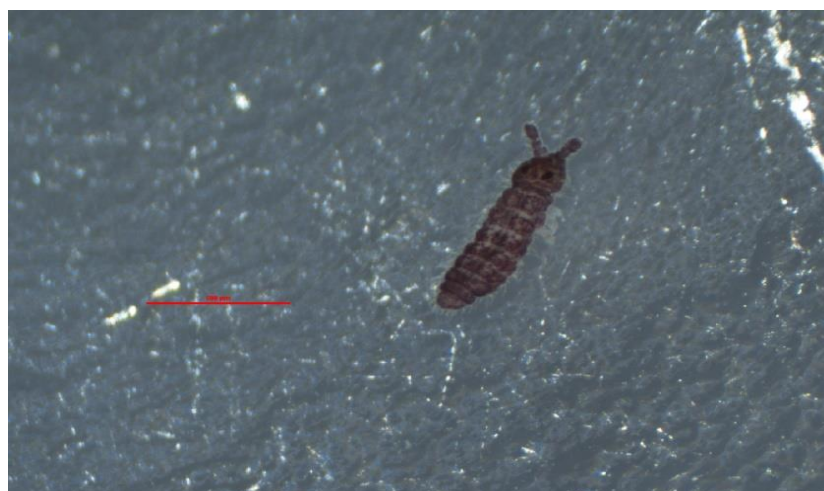

Species 33: *Hypogastrura* sp6.

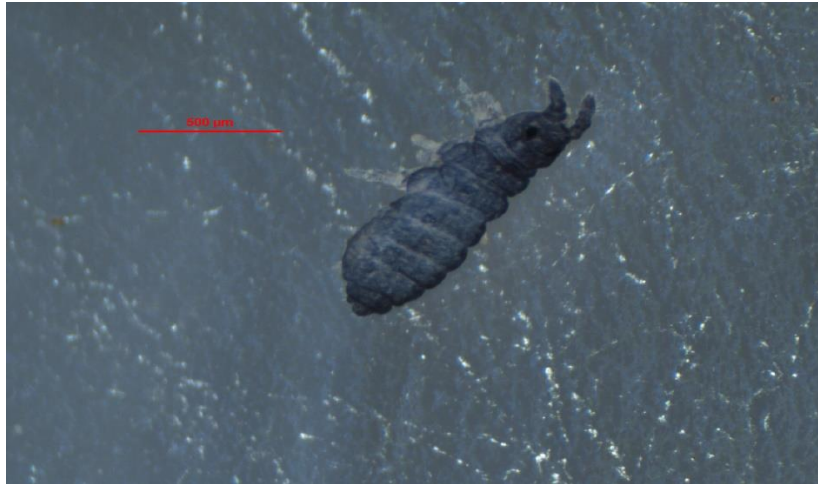

Species 34: *Ceratophysella* sp2.

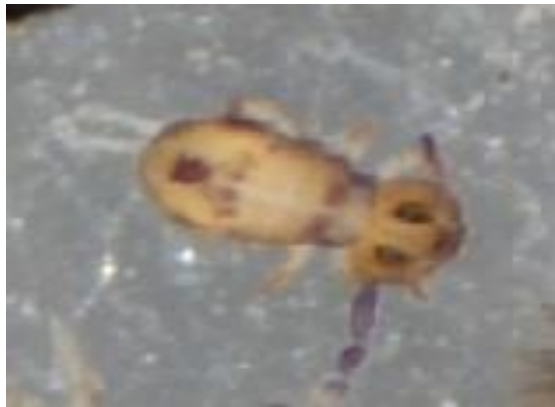

Species 35: *Bourletiella* sp3.



## Supplementary data B

**Table S1.** The dominance of each species except species 20 and 31 (because of 0% in all treatments) in 6 types of treatments used in our experiment is shown in this table by (\*\*\*) for more than 10% of the total number of Collembola collected from the treatment type mentioned in the column, (\*\*) for 1-10% of the total number of Collembola collected from the treatment type mentioned in the column and (\*) for 0-1% of the total number of Collembola collected from the treatment type mentioned in the column.

| Species    | Species Name                                    | Furca        | MP-MC       |           | RT-MC       |           | NT-MC       |           | MP-CS       |           | RT-CS       |           | NT-CS       |           |
|------------|-------------------------------------------------|--------------|-------------|-----------|-------------|-----------|-------------|-----------|-------------|-----------|-------------|-----------|-------------|-----------|
|            |                                                 |              | Individuals | Dominance |
| Species 1  | <i>Entomobrya sibirica</i> Stach, 1963          | Strong furca | 247         | ***       | 132         | ***       | 140         | ***       | 180         | ***       | 163         | ***       | 329         | ***       |
| Species 2  | <i>Lepidocyrtus cf. arrabonicus</i> Larr_Niea_3 | Strong furca | 455         | ***       | 283         | ***       | 198         | ***       | 297         | ***       | 173         | ***       | 333         | ***       |
| Species 3  | <i>Hypogastrura</i> sp1                         | Weak furca   | 201         | ***       | 140         | ***       | 68          | **        | 70          | **        | 352         | ***       | 497         | ***       |
| Species 4  | <i>Homidia socia</i> Denis, 1929                | Strong furca | 86          | **        | 45          | **        | 28          | **        | 123         | ***       | 30          | **        | 40          | **        |
| Species 5  | <i>Friesea</i> sp1.                             | Weak furca   | 0           | *         | 2           | *         | 0           | *         | 2           | *         | 0           | *         | 1           | *         |
| Species 6  | <i>Isotogastrura</i> sp1.                       | Strong furca | 20          | **        | 17          | **        | 5           | *         | 18          | **        | 1           | *         | 4           | *         |
| Species 7  | <i>Onychiurus</i> sp1.                          | Weak furca   | 26          | **        | 14          | **        | 23          | **        | 22          | **        | 29          | **        | 27          | *         |
| Species 8  | <i>Hypogastrura</i> sp2.                        | Weak furca   | 300         | ***       | 180         | ***       | 121         | ***       | 140         | ***       | 397         | ***       | 605         | ***       |
| Species 9  | <i>Isotogastrura</i> sp2.                       | Strong furca | 0           | *         | 3           | *         | 1           | *         | 2           | *         | 0           | *         | 1           | *         |
| Species 10 | <i>Hypogastrura</i> sp3.                        | Weak furca   | 8           | *         | 6           | *         | 4           | *         | 2           | *         | 9           | *         | 2           | *         |
| Species 11 | <i>Entomobrya</i> sp1.                          | Strong furca | 13          | *         | 7           | *         | 3           | *         | 17          | **        | 6           | *         | 7           | *         |
| Species 12 | <i>Thalassaphorura encarpata</i> Denis, 1931    | Weak furca   | 3           | *         | 4           | *         | 0           | *         | 2           | *         | 2           | *         | 4           | *         |
| Species 13 | <i>Friesea</i> sp2.                             | Weak furca   | 0           | *         | 2           | *         | 0           | *         | 1           | *         | 0           | *         | 4           | *         |
| Species 14 | <i>Entomobrya unostrigata</i> Stach, 1930       | Weak furca   | 40          | **        | 55          | **        | 37          | **        | 17          | **        | 83          | **        | 41          | **        |

| Species    | Species                                        | Species      | Species | Species | Species | Species | Species | Species | Species | Species | Species | Species | Species | Species |
|------------|------------------------------------------------|--------------|---------|---------|---------|---------|---------|---------|---------|---------|---------|---------|---------|---------|
| Species 15 | <i>Folsomia quadrioculata</i> Tullberg, 1871   | Weak furca   | 2       | *       | 2       | *       | 1       | *       | 1       | *       | 1       | *       | 2       | *       |
| Species 16 | <i>Schoettella unguiculata</i> Mitra, 1977     | Weak furca   | 129     | **      | 47      | **      | 50      | **      | 48      | **      | 154     | **      | 269     | **      |
| Species 17 | <i>Ceratophysella</i> sp1.                     | Weak furca   | 0       | *       | 0       | *       | 0       | *       | 0       | *       | 2       | *       | 0       | *       |
| Species 18 | <i>Friesea</i> sp3.                            | Weak furca   | 76      | **      | 42      | **      | 52      | **      | 82      | **      | 103     | **      | 447     | ***     |
| Species 19 | <i>Hypogastrura</i> sp4.                       | Weak furca   | 3       | *       | 12      | **      | 1       | *       | 1       | *       | 0       | *       | 105     | **      |
| Species 21 | <i>Onychiurus flavescens</i> Kinoshita, 1916   | Weak furca   | 6       | *       | 7       | *       | 2       | *       | 5       | *       | 3       | *       | 6       | *       |
| Species 22 | <i>Homidia</i> sp1.                            | Strong furca | 4       | *       | 3       | *       | 3       | *       | 9       | *       | 8       | *       | 1       | *       |
| Species 23 | <i>Bourletiella</i> sp1.                       | Strong furca | 6       | *       | 1       | *       | 3       | *       | 3       | *       | 0       | *       | 1       | *       |
| Species 24 | <i>Sminthurinus bimaculatus</i> Axelson, 1902  | Strong furca | 0       | *       | 0       | *       | 0       | *       | 1       | *       | 3       | *       | 17      | *       |
| Species 25 | <i>Hypogastrura</i> sp5.                       | Weak furca   | 0       | *       | 1       | *       | 0       | *       | 0       | *       | 2       | *       | 18      | *       |
| Species 26 | <i>Sminthurides</i> sp1.                       | Strong furca | 0       | *       | 1       | *       | 2       | *       | 0       | *       | 0       | *       | 3       | *       |
| Species 27 | <i>Pseudosinella octopunctata</i> Börner, 1901 | Strong furca | 24      | **      | 16      | **      | 3       | *       | 4       | *       | 11      | *       | 13      | *       |
| Species 28 | <i>Bourletiella</i> sp2.                       | Strong furca | 1       | *       | 0       | *       | 0       | *       | 0       | *       | 0       | *       | 0       | *       |
| Species 29 | <i>Neanura</i> sp1.                            | Weak furca   | 11      | *       | 11      | **      | 13      | **      | 3       | *       | 12      | *       | 18      | *       |
| Species 30 | <i>Isotogastrura</i> sp1.                      | Strong furca | 0       | *       | 1       | *       | 0       | *       | 0       | *       | 0       | *       | 0       | *       |
| Species 32 | <i>Sminthurides</i> sp2.                       | Strong furca | 2       | *       | 2       | *       | 2       | *       | 0       | *       | 1       | *       | 6       | *       |
| Species 33 | <i>Hypogastrura</i> sp6.                       | Weak furca   | 30      | **      | 23      | **      | 17      | **      | 9       | *       | 60      | **      | 49      | *       |
| Species 34 | <i>Ceratophysella</i> sp2.                     | Weak furca   | 5       | *       | 7       | *       | 14      | **      | 8       | *       | 15      | *       | 4       | *       |
| Species 35 | <i>Bourletiella</i> sp3.                       | Strong furca | 0       | *       | 0       | *       | 2       | *       | 0       | *       | 0       | *       | 0       | *       |
